# Supplementary material for: Temporal Dynamics of Fungal Communities in Alkali-Treated Round Bamboo Deterioration under Natural Weathering
Source: MDPI journal article supplement (doi:10.3390/microorganisms12050858), 2024-04-25
Supplement: s1 [file s1]

# Supplementary Materials:

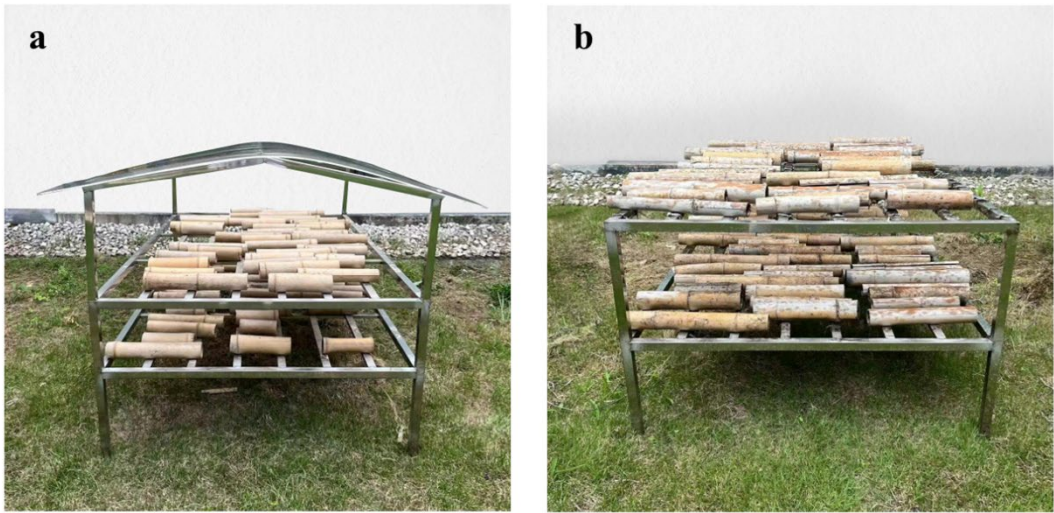

**Figure S1.** C3.1 (a) and C3.2 (b) biologically hazardous conditions.

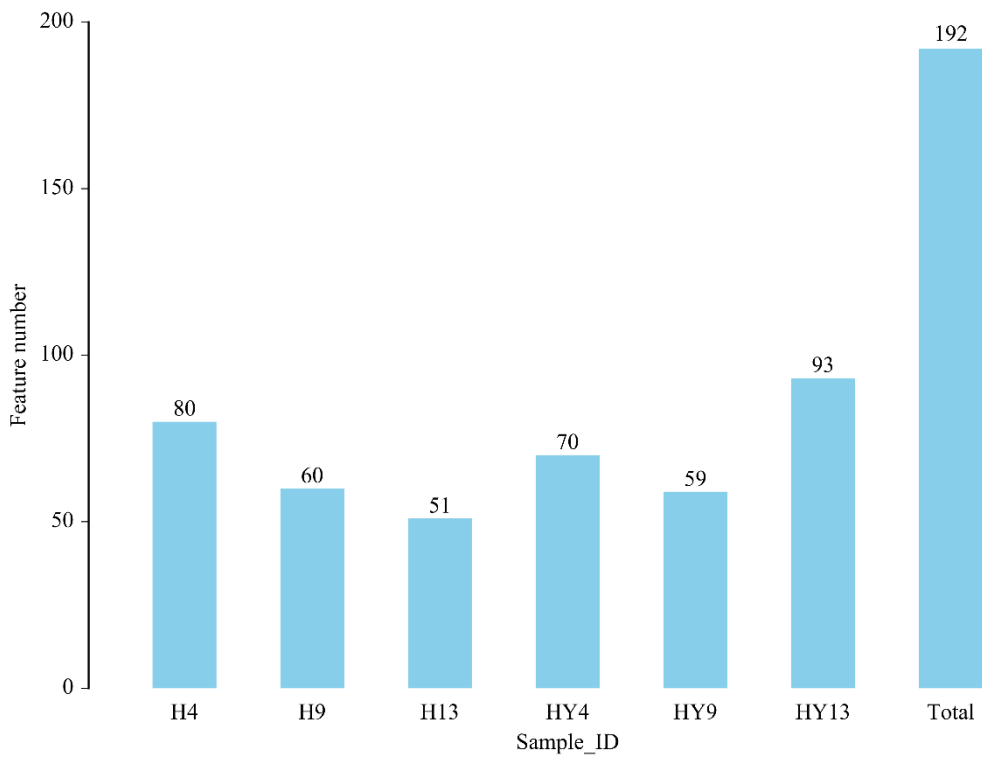

**Figure S2.** The number of ASVs of fungal community in different samples.

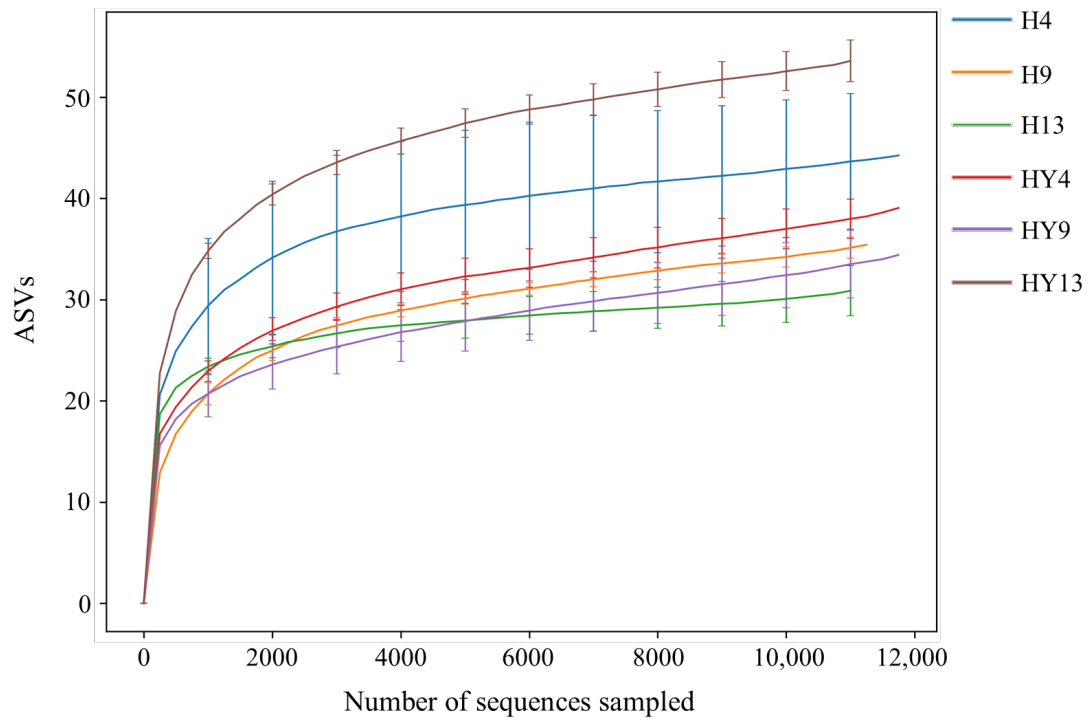

**Figure S3.** Rarefaction curves of the fungal community at different stages.

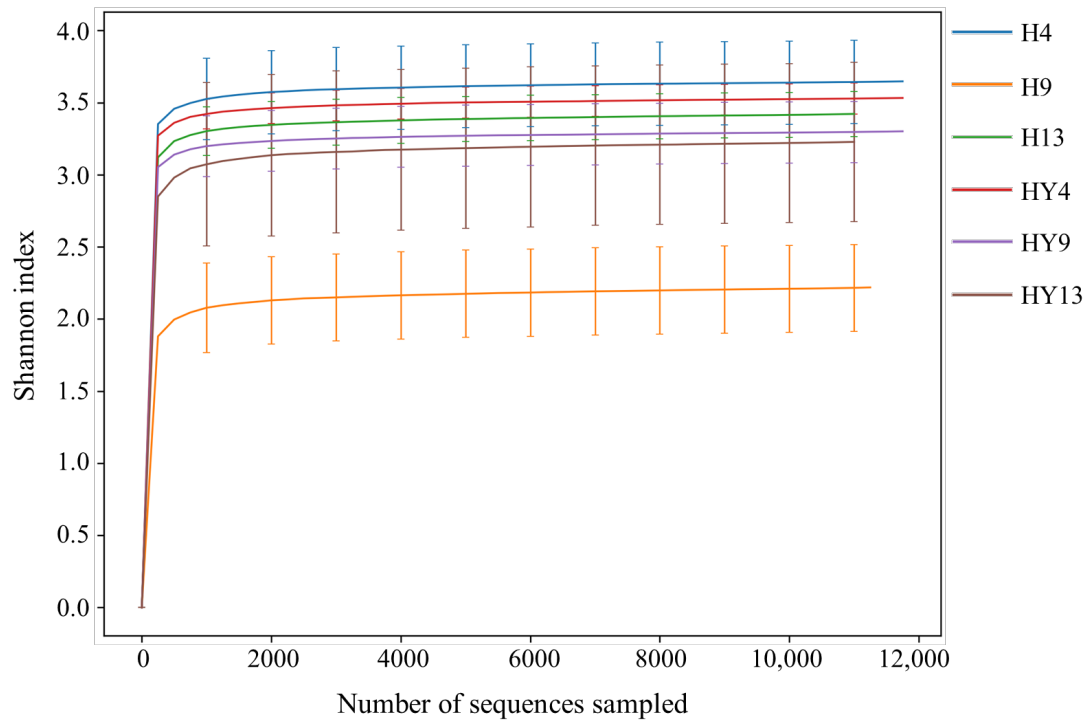

**Figure S4.** Shannon index of the fungal community at different stages.

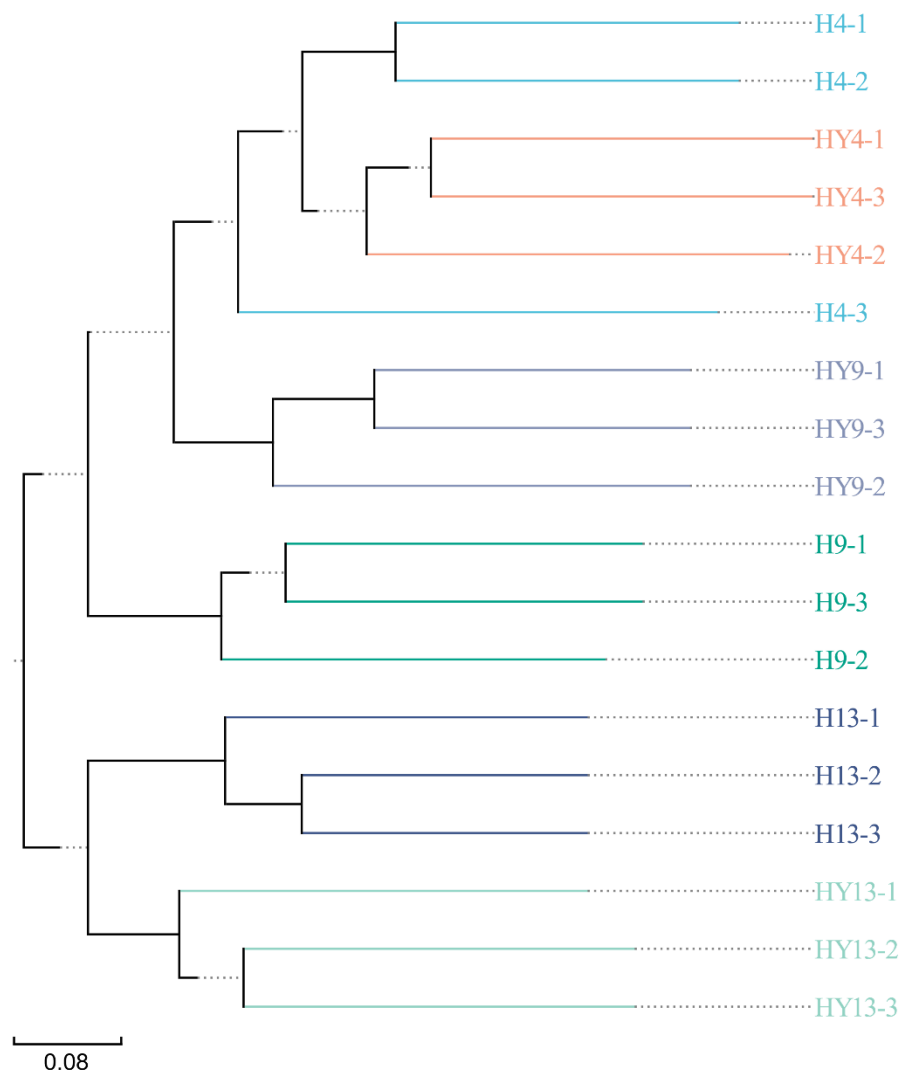

**Figure S5.** The UPGMA figure of the fungal community at different stages.
